# Supplementary material for: The International Society for Bipolar Disorders (ISBD) Task Force Report on Antidepressant Use in Bipolar Disorders
Source: Atypon-hosted journal article supplement (doi:10.1176/appi.ajp.2013.13020185), 2013-09-13
Supplement: 1249_ds001.pdf [file 1249_ds001.pdf]

 


Psychiatry Online
